# Supplementary material for: Mesoporous NiCo2O4 nanoflower constructed from nanosheets as electroactive materials for dye-sensitized solar cells
Source: Royal Society of Chemistry journal article supplement (doi:10.1039/c9ra03559a), 2019-01-01
Supplement: c9ra03559a1.pdf [file c9ra03559a1.pdf]

## Mesoporous NiCo<sub>2</sub>O<sub>4</sub> nanoflower constructed from nanosheets as electroactive materials for dye-sensitized solar cells

Fengxia Yang <sup>a</sup>, Xueli Tian <sup>a</sup>, Yanru Gu <sup>c</sup>, Keqiang Zhang <sup>a,\*</sup>, Lu Liu <sup>b,\*</sup>

<sup>a</sup>*Agro-Environmental Protection Institute, Ministry of Agriculture and Rural Affairs, Tianjin 300191, China*

<sup>b</sup>*Tianjin Key Laboratory of Environmental Remediation and Pollution Control, College of Environmental Science and Engineering, Nankai University, Tianjin 300071, P.R. China*

<sup>c</sup>*College of Resources and Environment, Northeast Agricultural University, Haerbin 150036, China*

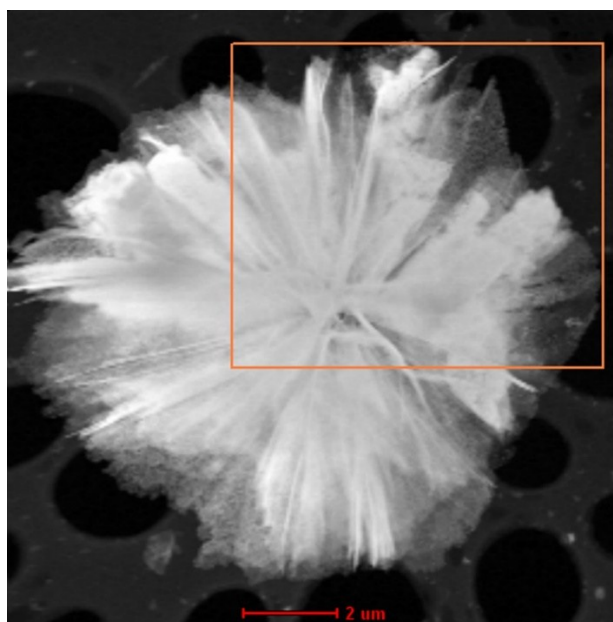

Figure S1. The selected area of NCO nanoflower for EDS mapping.

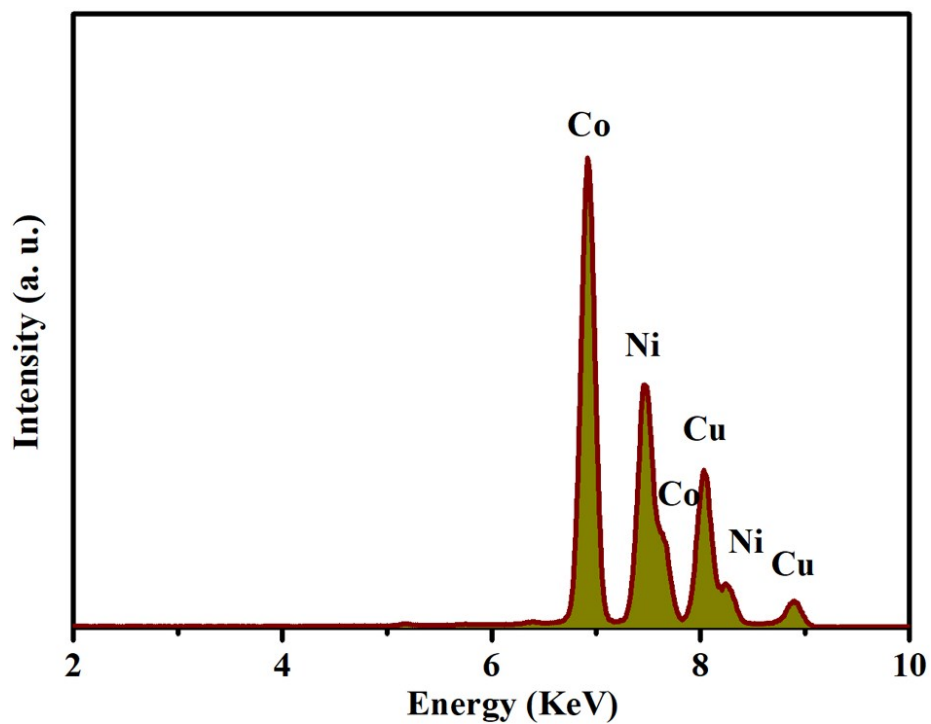

Figure S2. EDX spectrum (h) of NCO nanoflower obtained from the framed area shown in Figure S1.

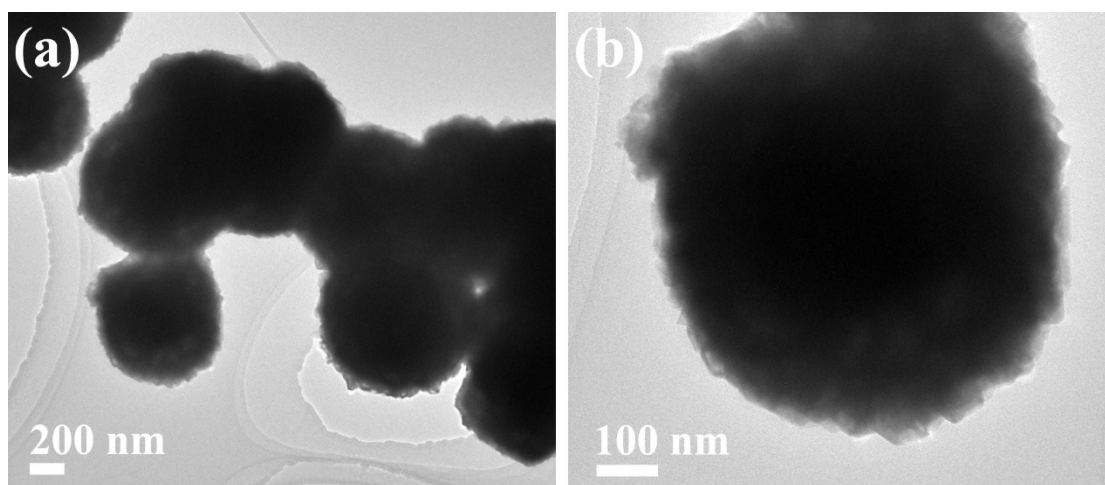

Figure S3. TEM images of NCO nanosphere at different magnifications.

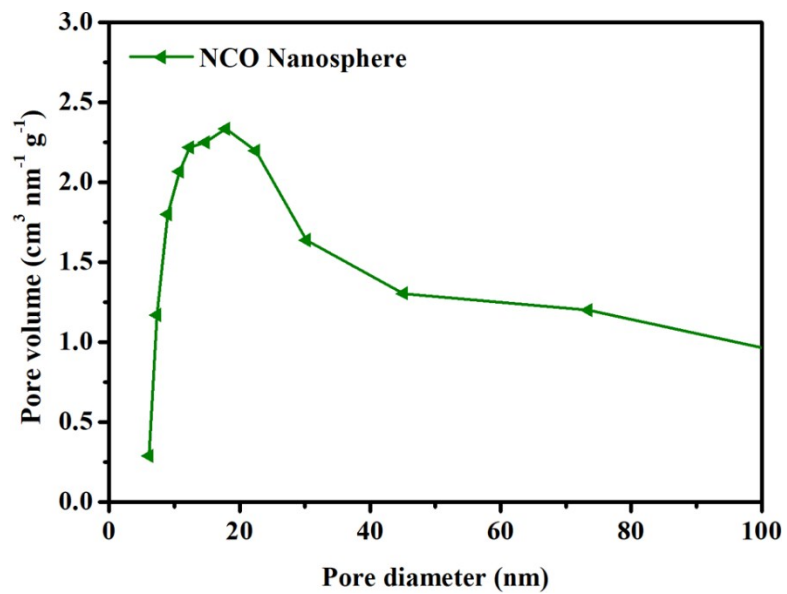

Figure S4. pore size distribution (d) of NCO nanosphere.

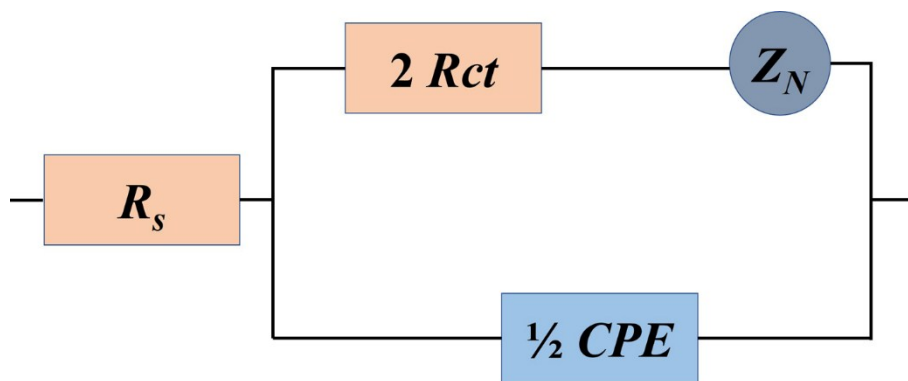

Figure S5. The equivalent circuit model of *EIS*.

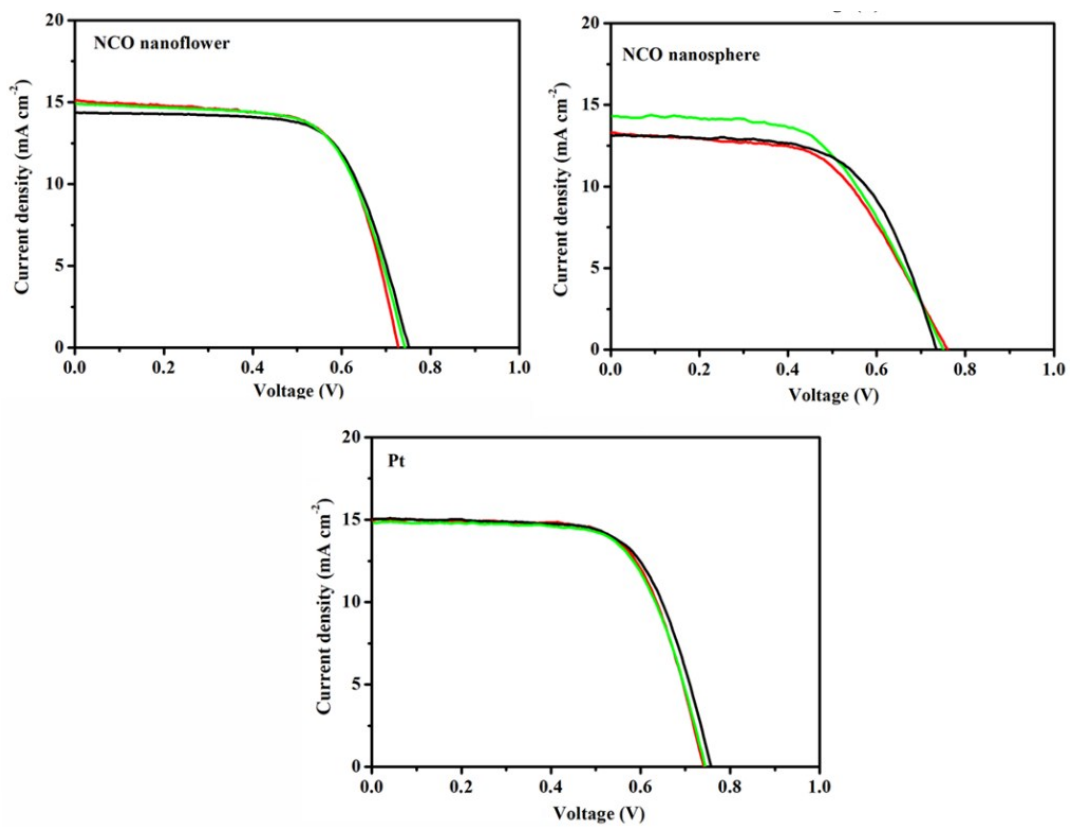

Figure S6. The J-V curves of NiCo<sub>2</sub>O<sub>4</sub> nanoflower, NiCo<sub>2</sub>O<sub>4</sub> nanosphere and Pt measured for three times, the red curves are supported in the manuscript.
